# Supplementary material for: Digital Technologies for Quality Assurance in the Construction Industry: Current Trend and Future Research Directions towards Industry 4.0
Source: MDPI journal article supplement (doi:10.3390/buildings14030844), 2024-03-21
Supplement: s1 [file s1]

## Supplementary Materials

Table S1: The 56 Selected Relvenat Article

| No. | Author                   | Year | Title                                                                                                                                            | Country   | Source     |
|-----|--------------------------|------|--------------------------------------------------------------------------------------------------------------------------------------------------|-----------|------------|
| 1   | Tang et al.              | 2022 | Benefits of terrestrial laser scanning for construction QA/QC: a time and cost analysis.                                                         | China     | Journal    |
| 2   | London et al.            | 2021 | Explanatory defect causation model linking digital innovation, human error and quality improvement in residential construction                   | Australia | Journal    |
| 3   | Carvalho et al.          | 2021 | Quality 4.0: an overview                                                                                                                         | Portugal  | Journal    |
| 4   | Fan et al                | 2021 | Machine learning applied to the design and inspection of reinforced concrete bridges: Resilient methods and emerging applications.               | China     | Journal    |
| 5   | Atkinson et al.          | 2021 | Challenges in the adoption of mobile information communication technology (M-ICT) in the construction phase of infrastructure projects in the UK | UK        | Journal    |
| 6   | Staples and Spillane     | 2019 | Exploring the Potential Improvement of Quality Control in the Construction Industry with the Use of Digital Technology                           | UK        | Conference |
| 7   | Petrova and Sulova       | 2020 | AI Governor for the Quality and the Strength of Bridges.                                                                                         | Bulgaria  | Conference |
| 8   | Fernández-Caramés et al. | 2018 | A fog computing based cyber-physical system for the automation of pipe-related tasks in the industry 4.0 shipyard                                | Spain     | Journal    |
| 9   | Huong et al.             | 2021 | Applying Bim and Related Technologies for Maintenance and Quality Management of Construction Assets in Vietnam                                   | Vietnam   | Journal    |
| 10  | Chen et al.              | 2021 | Application of Digital Technology in Safety Evaluation of Dabeishan Aqueduct.                                                                    | China     | Conference |
| 11  | Tuskaeva and Albegov     | 2021 | Construction Control Organization with Use of Computer and Information Technologies in Context of Sustainable Development Providing              | Russia    | Conference |
| 12  | Kosse et al              | 2022 | Digital Twin Framework for Enabling Serial Construction                                                                                          | Germany   | Journal    |
| 13  | Gallo et al.             | 2021 | CARES research: product and process digitalization for design and manufacturing of prefabricated cardboard panels                                | Italy     | conference |
| 14  | Loureiro                 | 2020 | Quality Management System according to the future of quality and Quality 4.0 principles and guidelines                                           | Portugal  | conference |

|    |                         |       |                                                                                                                                                                                                                          |           |            |
|----|-------------------------|-------|--------------------------------------------------------------------------------------------------------------------------------------------------------------------------------------------------------------------------|-----------|------------|
| 15 | Yurin et al.            | 2021  | Quality 4.0. Time of revolutionary changes in the QMS                                                                                                                                                                    | Russia    | conference |
| 16 | Kazarova et al.         | 2022  | Restoration of the Historically Valuable Town-Forming Object “Shevaldyshevskoe Courtyard, the Second Half of XVIII Century”, Using Building Information Modeling                                                         | Russia    | conference |
| 17 | Wagner et al.           | 2020a | Qualities of the Unique: Accuracy and Process-Control Management in Project-based Robotic Timber Construction                                                                                                            | Germany   | conference |
| 18 | Martinez et al.         | 2020  | Intelligent vision-based online inspection system of screw-fastening operations in light-gauge steel frame manufacturing                                                                                                 | Canada    | Journal    |
| 19 | Pan et al.              | 2021  | Research on quality assurance system of civil engineering talents' ability training under the background “the Belt and Road” based on BIM information technology                                                         | China     | conference |
| 20 | Solod et al.            | 2021  | Creation of Integrated Quality Systems for Standard Solutions of It Infrastructure Organization, Information Security of the Construction Complex at the Stage of the Real Estate Object Life Cycle (Construction Stage) | Russia    | conference |
| 21 | Gamlath et al.          | 2020  | Feasibility of Robotic Technology for The Advancement of Construction Industry in Sri Lanka                                                                                                                              | Sri Lanka | conference |
| 22 | Quiang et al.           | 2022  | The intelligent ultra-wide caster for high-quality slabs at Rizhao Shandong                                                                                                                                              | China     | conference |
| 23 | Ma et al.               | 2018  | Construction quality management based on a collaborative system using BIM and indoor positioning                                                                                                                         | China     | Journal    |
| 24 | Lu et al.               | 2022  | Construction E-Inspection 2.0 in the COVID-19 Pandemic Era: A Blockchain-Based Technical Solution                                                                                                                        | Hong Kong | Journal    |
| 25 | Li and Liu              | 2018  | Applications of multirotor drone technologies in construction management                                                                                                                                                 | Australia | Journal    |
| 26 | Nevalainen and Pellinen | 2016  | The use of a thermal camera for quality assurance of asphalt pavement construction                                                                                                                                       | Finland   | Journal    |
| 27 | Buswell et al.          | 2022  | Geometric quality assurance for 3D concrete printing and hybrid construction manufacturing using a standardised test part for benchmarking capability                                                                    | UK        | Journal    |
| 28 | Akinici et al.          | 2006  | A formalism for utilization of sensor systems and integrated project models for active construction quality control.                                                                                                     | USA       | Journal    |

|    |                          |      |                                                                                                                                 |           |            |
|----|--------------------------|------|---------------------------------------------------------------------------------------------------------------------------------|-----------|------------|
| 29 | Rinke et al.             | 2017 | Simulating quality assurance and efficiency analysis between construction management and engineering geodesy                    | Germany   | Journal    |
| 30 | Sheng et al.             | 2020 | Construction quality information management with blockchains                                                                    | China     | Journal    |
| 31 | Kalyan et al.            | 2016 | Construction quality assessment using 3D as-built models generated with Project Tango                                           | Canada    | Journal    |
| 32 | Gorden et al.            | 2003 | Combining reality capture technologies for construction defect detection: A case study                                          | USA       | Conference |
| 33 | Jaakkola and Toppi       | 2015 | Model based quality assurance process in a infra construction project-Case Riippa-Eskola RU2 double rail project                | Finland   | Conference |
| 34 | Nordahl Rolfsen et al.   | 2019 | On-site quality assurance: moving from forms to digital capture                                                                 | Norway    | Conference |
| 35 | Reisbacka et al.         | 2008 | Automating construction project quality assurance with RFID-and mobile technologies                                             | Finland   | Conference |
| 36 | Koo et al.               | 2019 | Enhancing Comprehensive Quality Assurance of Construction Projects toward Smart City Sustainability using Blockchain Technology | USA       | Conference |
| 37 | Allagala and Samarakkody | 2021 | Blockchain-based tractability framework for quality assurance in construction projects                                          | Sri Lanka | Conference |
| 38 | Rolfsen et al.           | 2021 | The use of the BIM-model and scanning in quality assurance of bridge constructions                                              | Norway    | Conference |
| 39 | Winkler et al.           | 2019 | Digitalization of data management and quality assurance in ground and tunnelling works                                          | Austria   | Conference |
| 40 | Doukari and Motamedi     | 2022 | An Ontology to Enable Semantic BIM-Based Data Quality Assurance and Quality Control                                             | UK        | Conference |
| 41 | Elshafey et al.          | 2010 | Thermal imaging technology: Quality control and quality assurance for construction of warm and hot mix asphalt pavements.       | Canada    | Conference |
| 42 | Koch and Vogelius        | 2006 | Evaluation of Web and PDA-based quality assurance system on a building site                                                     | Denmark   | Conference |
| 43 | Kim et al.               | 2016 | Automated dimensional quality assurance of full-scale precast concrete elements using laser scanning and BIM.                   | UK        | Journal    |

|    |                   |       |                                                                                                                                                                        |              |            |
|----|-------------------|-------|------------------------------------------------------------------------------------------------------------------------------------------------------------------------|--------------|------------|
| 44 | Wagner et al.     | 2020b | Towards digital automation flexibility in large-scale timber construction: integrative robotic prefabrication and co-design of the BUGA Wood Pavilion                  | Germany      | Journal    |
| 45 | Wilson et al.     | 2020  | Ground penetrating radar as a quality assurance tool in hot-mix asphalt road construction                                                                              | -            | Journal    |
| 46 | Moreu et al.      | 2020  | Bridge Construction Monitoring using LIDAR for Quantified, Objective Quality-Control Quality-Assurance (QOQCQA)                                                        | USA          | Conference |
| 47 | Häußler et al.    | 2020  | Model-based quality assurance in railway infrastructure planning                                                                                                       | Germany      | Journal    |
| 48 | Chen and Luo      | 2014  | A BIM-based construction quality management model and its applications                                                                                                 | China        | Journal    |
| 49 | Savu et al.       | 2017  | Quality assurance framework for new property development: A decentralized blockchain solution for the smart cities of the future                                       | Romania      | Journal    |
| 50 | Lee et al.        | 2014  | Building Information Modelling for Quality Management in Infrastructure Construction Projects                                                                          | USA          | Conference |
| 51 | Yang              | 2021  | Construction of School Quality Assurance System Based on Big Data Analysis. In International conference on Big Data Analytics for Cyber-Physical-Systems (pp. 381-388) | Philippines  | Conference |
| 52 | Lupăşteanu et al. | 2022  | Condition assessment of buildings in Romania: A proposed method and case study                                                                                         | Romania      | Journal    |
| 53 | Farsäter et al.   | 2019  | Building status obtained before renovating multifamily buildings in Sweden                                                                                             | Sweden       | Journal    |
| 54 | Lee et al.        | 2023  | Vision-based inspection of prefabricated components using camera poses: Addressing inherent limitations of image-based 3D reconstruction                               | USA          | Journal    |
| 55 | Tran et al.       | 2021  | A digital twin approach for geometric quality assessment of as-built prefabricated façades                                                                             | Australia    | Journal    |
| 56 | Alaskar et al.    | 2021  | Performance evaluation of reinforced concrete beams with corroded web reinforcement: Experimental and theoretical study                                                | Saudi Arabia | Journal    |

Table S2: Detailed Analysis of the 56 Selected Relevant Articles

| Author          | Year | Method                          | Technology                                                                                                                | Focus                                                                                                                                                                                   | Limitation                                                                                                                                                                                                                                                                                                                                                                       | Country   |
|-----------------|------|---------------------------------|---------------------------------------------------------------------------------------------------------------------------|-----------------------------------------------------------------------------------------------------------------------------------------------------------------------------------------|----------------------------------------------------------------------------------------------------------------------------------------------------------------------------------------------------------------------------------------------------------------------------------------------------------------------------------------------------------------------------------|-----------|
| Tang et al.     | 2022 | Case study, quantitative        | Terrestrial laser scanning                                                                                                | Checking the geometric quality of buildings                                                                                                                                             | The study considers only the QA/QC tasks upon project completion. The QA/QC tasks during the construction, period are not considered. Second, this study only takes a residential building project as the case to collect QA/QC data. The QA/QC data collected from other types of projects with different structures can be substantially different, requiring future research. | China     |
| London et al.   | 2021 | Qualitative case study          | mobile digital technology                                                                                                 | Reduce defects in housing construction                                                                                                                                                  | Lack of methodology to examine how the full model can be translated into the analytical device for collaboration. Lack of efficient conceptualization                                                                                                                                                                                                                            | Australia |
| Carvalho et al. | 2021 | Qualitative(content analysis)   | Data science and statistics, IoT, VR/AR, Cloud computing, Big data, blockchain. AI, ML, NeUral network and Deep learning, | Management commitment, customer involvement, supplier involvement, employee involvement, benchmarking technique, process management, information and analysis, formal strategy planning | Lack of empirical studies that demonstrate the influence of Industry 4.0 on quality management practices and company's performance,                                                                                                                                                                                                                                              | Portugal  |
| Fan et al       | 2021 | Document analysis               | Machine learning                                                                                                          | Inspection of reinforced concrete bridges                                                                                                                                               | Immaturity of machine learning applications in this domain                                                                                                                                                                                                                                                                                                                       | China     |
| Atkinson et al. | 2021 | Exploratory Multiple Case Study | Mobile information communication technology, BIM                                                                          | Quality delivery process at the construction phase                                                                                                                                      | No emphasis on the clear push for digital technologies for quality assurance                                                                                                                                                                                                                                                                                                     | UK        |

|                          |      |                                                         |                                                                                                                                                                                                                                                                                                                           |                                                                                   |                                                                                                                                                 |          |
|--------------------------|------|---------------------------------------------------------|---------------------------------------------------------------------------------------------------------------------------------------------------------------------------------------------------------------------------------------------------------------------------------------------------------------------------|-----------------------------------------------------------------------------------|-------------------------------------------------------------------------------------------------------------------------------------------------|----------|
| Staples and Spillane     | 2019 | Qualitative method, document analysis                   | BIM, MOBILE TECHNOLOGY, mobile web, digital inspection test plan (ITP), REAL-TIME DATA PERFORMANCE DATA, point cloud of as, built work, 3d vision to mobile phone, condition-based monitoring, 2D geological models, radio frequency identification, photogrammetric vision, ID and 2D barcodes, mobile mapping platform. | Quality management at the construction phase for potential improvement of quality | No emphasis on the clear push for digital technologies for quality assurance                                                                    | UK       |
| Petrova and Sulova       | 2020 | Qualitative method, document analysis                   | AI Governor, real-time data analysis                                                                                                                                                                                                                                                                                      | Checking the strength of buildings                                                | Lack of unified method for monitoring bridges and controlling human safety as well as saving the national memory.                               | Bulgaria |
| Fernández-Caramés et al. | 2018 | Case study                                              | Fog computing, cyber-physical system                                                                                                                                                                                                                                                                                      | Automatically Identifying and tracking the pipes of the infrastructure            | Lack of clarity on the model's efficiency                                                                                                       | Spain    |
| Huong et al.             | 2021 | Mixed method (survey, interview, and document analysis) | BIM, Barcode, Radio Frequency Identification (RFID), Sensor, Internet of Things (IoT), Augmented Reality (AR)                                                                                                                                                                                                             | Maintenance and quality management                                                | The technology readiness of the maintenance unit is narrow and needs to be improved                                                             | Vietnam  |
| Chen et al.              | 2021 | Case study                                              | Drone aerial photography, BIM, and three-dimensional laser scanning                                                                                                                                                                                                                                                       | carrying out safety test and evaluation                                           | The technology readiness of the maintenance unit is narrow and needs to be improved                                                             | China    |
| Tuskaeva and Albegov     | 2021 | Document analysis                                       | BIM                                                                                                                                                                                                                                                                                                                       | control tasks of the entire construction production process.                      | The technology readiness of the maintenance unit is narrow and needs to be improved                                                             | Russia   |
| Kosse et al              | 2022 | Case study                                              | Digital twin technology                                                                                                                                                                                                                                                                                                   | checking the quality of precast concrete production                               | Lack of common implementation of the Industry 4.0 language for the application in the production of precast concrete elements to ensure quality | Germany  |

|                 |      |                                   |                                                                                    |                                                                                                                                                                  |                                                                                                                                                                                                                |           |
|-----------------|------|-----------------------------------|------------------------------------------------------------------------------------|------------------------------------------------------------------------------------------------------------------------------------------------------------------|----------------------------------------------------------------------------------------------------------------------------------------------------------------------------------------------------------------|-----------|
| Gallo et al.    | 2021 | Case study                        | BIM                                                                                | achieving sustainability goals, such as reduction of errors, reduction of material wastes, cost and time predictability, product customization, and adaptability | Concerns the integration of BIM-based families with simulation tools for structural and energy-performances evaluation, particularly their integration with structural and Building Energy Modelling software. | Italy     |
| Loureiro        | 2020 | Case study                        | C-SUITE level                                                                      | The needs and expectations of the stakeholders                                                                                                                   | The technology readiness of the maintenance unit is narrow and needs to be improved                                                                                                                            | Portugal  |
| Yurin et al.    | 2021 | Experiment                        | Learning mechanism of functioning (MFF) and GFM, PROBABILISTIC ITERATIVE ALGORITHM | To achieve efficient a quality tool                                                                                                                              | The technology readiness of the maintenance unit is narrow and needs to be improved                                                                                                                            | Russia    |
| Kazarova et al. | 2022 | Case study                        | BIM                                                                                | RESTORATION of building elements                                                                                                                                 | The technology readiness of the maintenance unit is narrow and needs to be improved                                                                                                                            | Russia    |
| Wagner et al.   | 2020 | Case study                        | robotic fabrication                                                                | Achieve and control production quality by checking the accuracy.                                                                                                 | The technology readiness of the maintenance unit is narrow and needs to be improved                                                                                                                            | Germany   |
| Martinez et al. | 2020 | Experiment                        | automated vision-based online inspection system                                    | Screw-fastening operations in light gauge steel frame manufacturing for quality modular construction project                                                     | Concerns on whether the inspection system will be taken to a continuous production setup to validate further and test its accuracy and applicability.                                                          | Canada    |
| Pan et al.      | 2021 | Case study                        | BIM                                                                                | QUALITY cycling monitoring                                                                                                                                       | The technology readiness of the maintenance unit is narrow and needs to be improved                                                                                                                            | China     |
| Solod et al.    | 2021 | Quantitative (ISM), Case study    | IT SYSTEMS, INFORMATION SECURITY SYSTEMS                                           | Improvement of management mechanisms                                                                                                                             | The technology readiness of the maintenance unit is narrow and needs to be improved                                                                                                                            | Russia    |
| Gamlath et al.  | 2020 | quantitative (survey), case study | robotic technology                                                                 | Quality enhancement in construction                                                                                                                              | The technology readiness of the maintenance unit is narrow and needs to be improved                                                                                                                            | Sri Lanka |
| Quiang et al.   | 2022 | Case study                        | intelligent ultra-wide caster                                                      | High-quality slab production                                                                                                                                     | The technology readiness of the maintenance unit is narrow and needs to be improved                                                                                                                            | China     |

|                         |      |              |                                    |                                                                               |                                                                                                                                                                                                                                                                                                                                                                                                                   |           |
|-------------------------|------|--------------|------------------------------------|-------------------------------------------------------------------------------|-------------------------------------------------------------------------------------------------------------------------------------------------------------------------------------------------------------------------------------------------------------------------------------------------------------------------------------------------------------------------------------------------------------------|-----------|
| Ma et al.               | 2018 | Case study   | BIM, and Indoor positioning system | Ensure construction quality management, more effective and collaborative      | Concern about Automatic association with construction schedules and inspector assignment with the system to generate a more detailed inspection plan; concern on Customization of the check items and criteria from the standard for different application scenarios; Integration of more technologies to collect the inspection data more conveniently, such as voice input, AR and image-matching technologies. | China     |
| Wu et al.               | 2022 | Case study   | BIM, BLOCKCHAIN TECHNOLOGY         | Ensure data transparency and protection during data collection on the project | Highly technical                                                                                                                                                                                                                                                                                                                                                                                                  | Hong Kong |
| Li and Liu              | 2018 | Case study   | Multicopter drones                 | Quality checks, AND SUPERVISION                                               | The technology readiness of the maintenance unit is narrow and needs to be improved                                                                                                                                                                                                                                                                                                                               | Australia |
| Nevalainen and Pellinen | 2016 | experimental | Thermal camera                     | Quantify the asphalt pavement homogeneity                                     | The technology readiness of the maintenance unit is narrow and needs to be improved                                                                                                                                                                                                                                                                                                                               | Finland   |
| Buswell et al.          | 2022 | Case study   | 3D model                           | Checking the geometric quality of buildings                                   | The technology readiness of the maintenance unit is narrow and needs to be improved                                                                                                                                                                                                                                                                                                                               | UK        |
| Akinci et al.           | 2006 | Case study   | IoT                                | Defect management                                                             | The technology readiness of the maintenance unit is narrow and needs to be improved                                                                                                                                                                                                                                                                                                                               | USA       |
| Rinke et al.            | 2017 | Case study   | Geodetic surveying technology      | Optimizing the efficiency of the process                                      | The technology readiness of the maintenance unit is narrow and needs to be improved                                                                                                                                                                                                                                                                                                                               | Germany   |
| Sheng et al.            | 2020 | Case study   | Blockchain                         | Security and transparency                                                     | The technology readiness of the maintenance unit is narrow and needs to be improved                                                                                                                                                                                                                                                                                                                               | china     |
| Kalyan et al.           | 2016 | Case study   | 3D models                          | Quality control process                                                       | The technology readiness of the maintenance unit is narrow and needs to be improved                                                                                                                                                                                                                                                                                                                               | Canada    |
| Gorden et al.           | 2003 | Case study   | Reality capture                    | Defect detection                                                              | The technology readiness of the maintenance unit is narrow and needs to be improved                                                                                                                                                                                                                                                                                                                               | USA       |
| Jaakkola and Toppi      | 2015 | Case study   | IoT                                | Improve the process                                                           | The technology readiness of the maintenance unit is narrow and needs to be improved                                                                                                                                                                                                                                                                                                                               | Finland   |
| Nordahl Rolfsen et al.  | 2019 | Case study   | 3D Model                           | Improve the process                                                           | The technology readiness of the maintenance unit is narrow and needs to be improved                                                                                                                                                                                                                                                                                                                               | Norway    |
| Reisbacka et al.        | 2008 | Case study   | RFID-and mobile technologies       | Defect management                                                             | The technology readiness of the maintenance unit is narrow and needs to be improved                                                                                                                                                                                                                                                                                                                               | Finland   |



|                          |       |            |                              |                                                                                       |                                                                                     |           |
|--------------------------|-------|------------|------------------------------|---------------------------------------------------------------------------------------|-------------------------------------------------------------------------------------|-----------|
| Koo et al.               | 2019  | Case study | Blockchain                   | accuracy, effectiveness, transparency, and risk allocation                            | Highly conceptual                                                                   | USA       |
| Allagala and Samarakkody | 2021  | Experiment | Blockchain                   | Provide a higher level of transparency and visibility of the quality control process. | Lack of clear push for digital technologies for QA;                                 | Sri Lanka |
| Rolfesen et al.          | 2021  | Case study | BIM model, 3D laser scanning | Defect detection                                                                      | Lack of efficient methodology conceptualisation                                     | Norway    |
| Winkler et al.           | 2019  | Case study | Big data                     | Improve the process                                                                   | Narrowness of technology readiness                                                  | Austria   |
| Doukari and Motamedi     | 2022  | Case study | BIM, AI                      | Improve the process                                                                   | No emphasis on the clear push for digital technologies for quality assurance        | UK        |
| Elshafey et al.          | 2010  | Case study | Thermal imaging              | Improve the process                                                                   | Lack of efficient methodology conceptualization                                     | Canada    |
| Koch and Vogelius        | 2006  | Case study | Cloud computing              | Improve the process                                                                   | Narrowness of technology readiness                                                  | Denmark   |
| Kim et al.               | 2016  | Experiment | Mobile technology            | Quality inspection and efficient management                                           | The technology readiness of the maintenance unit is narrow and needs to be improved | UK        |
| Wagner et al.            | 2020b | Case study | Robotics, prefabrication     | Improve the process                                                                   | Lack of efficient methodology conceptualisation                                     | Germany   |
| Wilson et al.            | 2020  | Case study | Radar                        | Improve the process                                                                   | Narrowness of technology readiness                                                  | -         |
| Moreu et al.             | 2020  | Case study | Lidar                        | Improve the process                                                                   | No emphasis on the clear push for digital technologies for quality assurance        | USA       |
| Häußler et al.           | 2020  | Case study | 3D model                     | Clash detection                                                                       | Lack of efficient methodology conceptualization                                     | Germany   |
| Chen and Luo             | 2014  | Case study | 4D model                     | Improve the process and quality control                                               | Lack of clear push for digital technologies for QA                                  | China     |
| Savu et al.              | 2017  | Case study | Blockchain                   | Improve the process of accountability                                                 | Lack of efficient methodology conceptualization.                                    | Romania   |

|                   |      |                   |                            |                                                      |                                                                                     |              |
|-------------------|------|-------------------|----------------------------|------------------------------------------------------|-------------------------------------------------------------------------------------|--------------|
| Lee et al.        | 2014 | Document analysis | BIM                        | Improve the process and quality control              | Narrowness of technology readiness                                                  | USA          |
| Yang              | 2021 | Case study        | Bigdata                    | Improve the process                                  | The technology readiness of the maintenance unit is narrow and needs to be improved | Philippines  |
| Lupășteanu et al. | 2022 | Case study        | BIM                        | Improve the process                                  | Lack of clear push for digital technologies for QA;                                 | Romania      |
| Farsäter et al.   | 2019 | Case study        | BIM                        | Improve the process                                  | Lack of efficient methodology conceptualization.                                    | Sweden       |
| Lee et al.        | 2023 | Case study        | 3D BIM, Camera             | Improve the process                                  | Narrowness of technology readiness                                                  | USA          |
| Tran et al.       | 2021 | Case study        | Digital twin technology    | Accuracy, completeness, and correctness of processes | No emphasis on the clear push for digital technologies for quality assurance.       | Australia    |
| Alaskar et al.    | 2021 | Experiment        | Corroded web reinforcement | Improve the process                                  | Lack of clear push for digital technologies for QA.                                 | Saudi Arabia |
